# Supplementary material for: Lithium isotopic composition of reference materials of biological origin TORT-2, DORM-2, TORT-3, DORM-4, SRM-1400 and ERM-CE278k
Source: Royal Society of Chemistry journal article supplement (doi:10.1039/d1ja00045d), 2021-01-01
Supplement: d1ja00045d1.pdf [file d1ja00045d1.pdf]

## ELECTRONIC SUPPLEMENTARY INFORMATION

of

# **Lithium isotopic composition of reference materials of biological origin TORT-2, DORM-2, TORT-3, DORM-4, SRM- 1400 and ERM-CE278k**

*Fanny Thibon<sup>a\*</sup>, Lucas Weppe<sup>a-b</sup>, Maryline Montanes<sup>a</sup>, Philippe Telouk<sup>c</sup>, and Nathalie Vigier<sup>a</sup>*

<sup>a</sup>Laboratoire d'Océanographie de Villefranche-sur-Mer (LOV), CNRS UMR 7093, Sorbonne université,  
06230 Villefranche-sur-Mer, France

<sup>b</sup> Littoral Environnement et Sociétés (LIENSs), UMR 7266 CNRS - La Rochelle Université, F-17000 La  
Rochelle, France

<sup>c</sup>Ecole Normale Supérieure de Lyon, CNRS and Université Claude Bernard Lyon 1, 69000 Lyon, France

**Figure S1:** A summarized sketch of the followed procedure on reference material SRM-1400, ERM-CE278k, DORM-2, TORT-2, and in-house material PLK-VLFR. Sample names reported in article figures and tables are reported in pink.

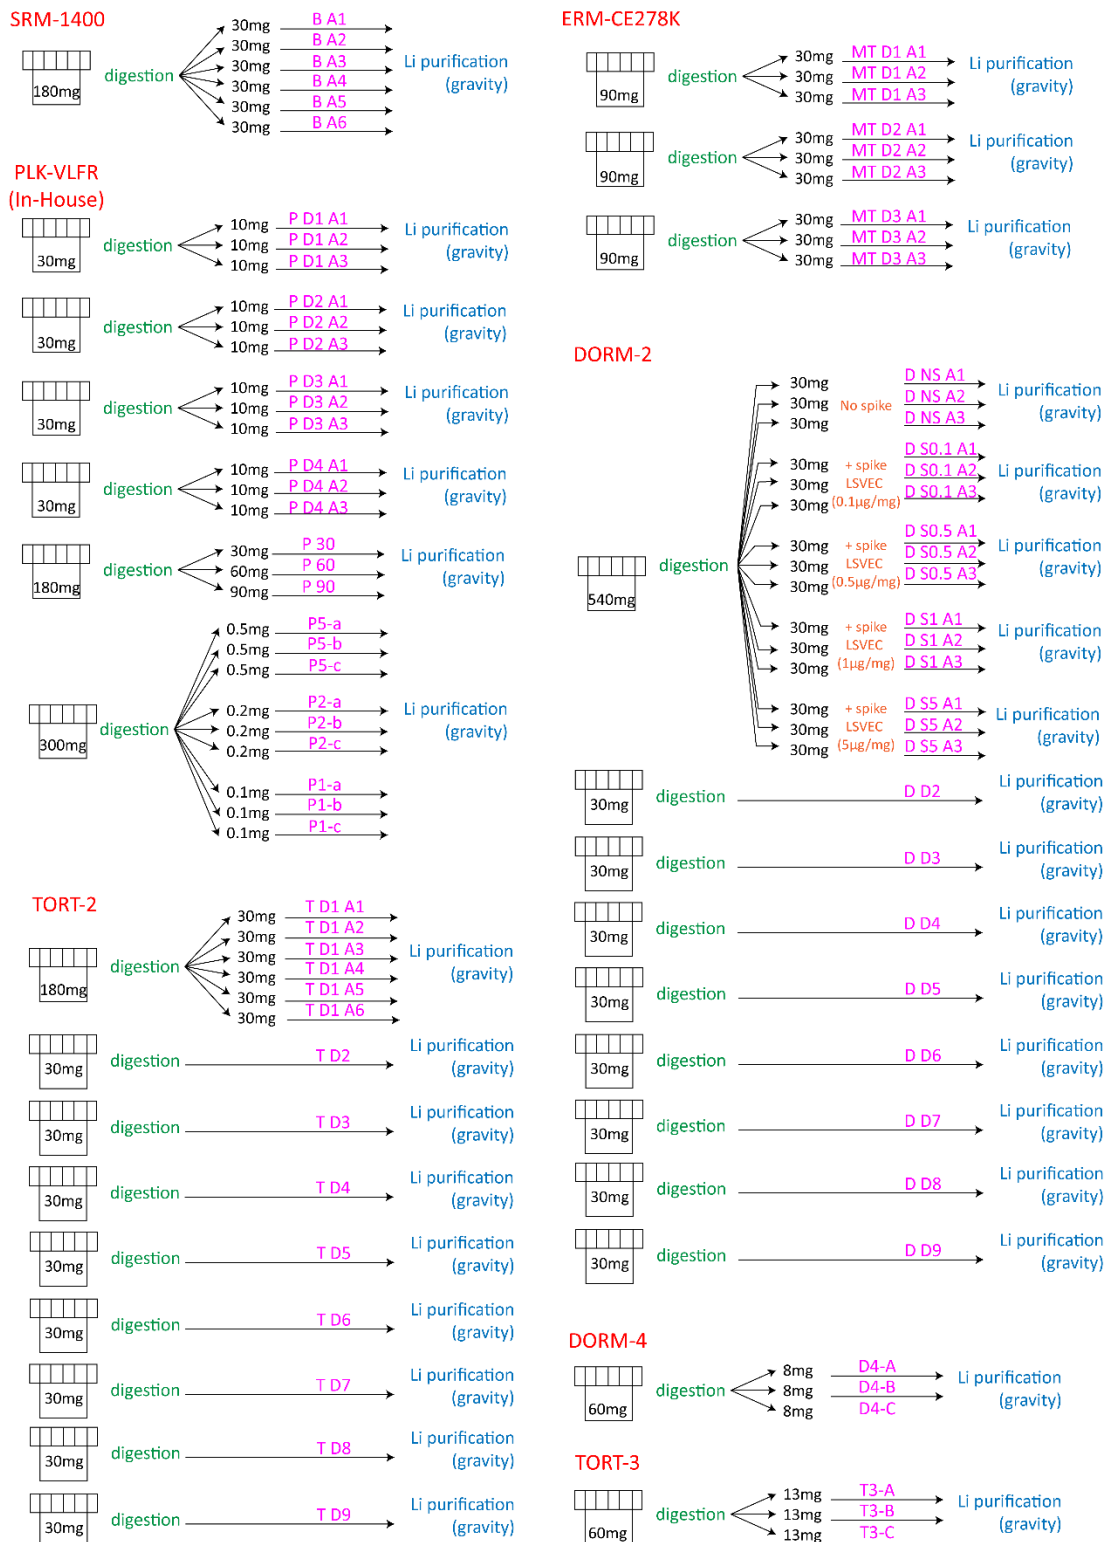

**Figure S2:** Screen shot of the Peak shape at collectors H4 ( $^7\text{Li}$ ) and L4 ( $^6\text{Li}$ ) for (a) LSVEC 4 ng/mL with blank  $\text{HNO}_3$  0.5N (20 mV  $^7\text{Li}$ ) and (c) PLK-VLFR 4 ng/mL.

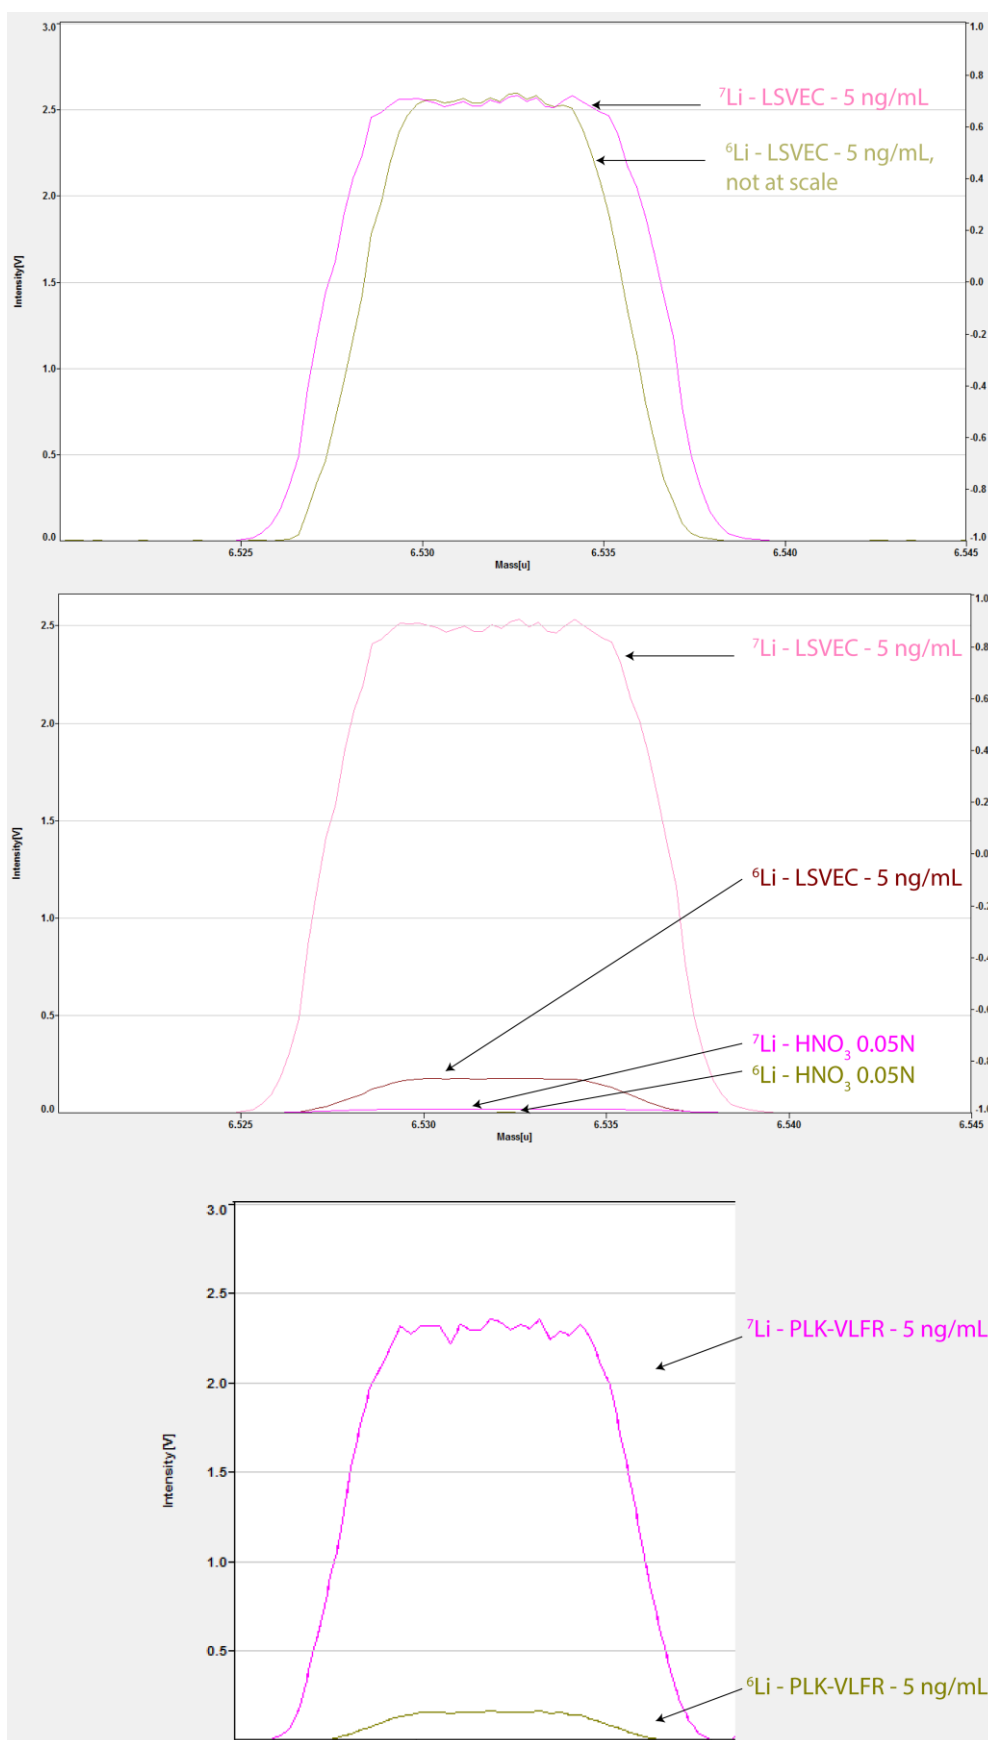

**Table S1:**  $\delta^7\text{Li}$  of seven reference materials (ERM-CE278k, SRM-1400, TORT-2, TORT-3, Li7-N, DORM-2, and DORM-4) and one in-house standard (PLK-VLFR). "DW loaded" for the equivalent of dry weight loaded on a cationic resin column, "N" for digestion number (D#), "n" for Li-purification number (P#), "Li DW" for the material Li concentration, "bracket match" for the concentration matching with the standard bracketing during isotope ratio measurement, "se" for internal error. Sample name code: "P" for plankton, "MT" for mussel tissue, "B" for Bone Ash, "T" for TORT, "D" for DORM, "D#" for digestion number (correspond to "N"), "A#" for Li-purification aliquot number (correspond to "n").

| Sple Type                 | Ref. Mat.           | Sple Name | Li DW<br>( $\mu\text{g/g}$ ) | N<br>(D#) | DW loaded<br>(mg) | Li loaded<br>( $\mu\text{g}$ ) | n<br>(P#) | Bracket<br>mach (%) | Li (ng/mL)<br>MC-ICP-MS | $\delta^7\text{Li}$<br>(‰) | se<br>(‰) |
|---------------------------|---------------------|-----------|------------------------------|-----------|-------------------|--------------------------------|-----------|---------------------|-------------------------|----------------------------|-----------|
| PLANKTON                  | PLK-VLFR (in-house) | P-D1-A1   | 10.4                         | 1         | 10                | 0.104                          | 1         | 120                 | 4.8                     | 30.96                      | 0.02      |
|                           |                     | P-D1-A2   |                              |           | 10                | 0.104                          | 2         | 120                 | 4.8                     | 31.15                      | 0.02      |
|                           |                     | P-D1-A3   |                              |           | 10                | 0.104                          | 3         | 120                 | 4.8                     | 31.28                      | 0.12      |
|                           |                     | P-D2-A1   |                              | 2         | 10                | 0.104                          | 1         | 120                 | 4.8                     | 30.65                      | 0.02      |
|                           |                     | P-D2-A2   |                              |           | 10                | 0.104                          | 2         | 120                 | 4.8                     | 30.70                      | 0.02      |
|                           |                     | P-D2-A3   |                              |           | 10                | 0.104                          | 3         | 120                 | 4.8                     | 31.05                      | 0.04      |
|                           |                     | P-D3-A1   |                              | 3         | 10                | 0.104                          | 1         | 120                 | 4.8                     | 31.19                      | 0.03      |
|                           |                     | P-D3-A2   |                              |           | 10                | 0.104                          | 2         | 120                 | 4.8                     | 31.29                      | 0.03      |
|                           |                     | P-D3-A3   |                              |           | 10                | 0.104                          | 3         | 120                 | 4.8                     | 31.45                      | 0.04      |
|                           |                     | P-D4-A1   |                              | 4         | 10                | 0.104                          | 1         | 120                 | 4.8                     | 30.72                      | 0.03      |
|                           |                     | P-D4-A2   |                              |           | 10                | 0.104                          | 2         | 120                 | 4.8                     | 31.09                      | 0.03      |
|                           |                     | P-D4-A3   |                              |           | 10                | 0.104                          | 3         | 120                 | 4.8                     | 30.92                      | 0.03      |
|                           |                     | P-30      |                              | 6         | 30                | 0.312                          | 1         | 120                 | 4.8                     | 30.67                      | 0.05      |
|                           |                     | P-60      |                              |           | 60                | 0.624                          | 2         | 120                 | 4.8                     | 30.74                      | 0.03      |
|                           |                     | P-90      |                              |           | 90                | 0.936                          | 3         | 120                 | 4.8                     | 30.83                      | 0.03      |
|                           |                     | P-D5-5-a  |                              | 5         | 0.48              | 0.005                          | 1         | 128                 | 5.1                     | 29.36                      | 0.02      |
|                           |                     | P-D5-5-b  |                              |           | 0.48              | 0.005                          | 2         | 128                 | 5.1                     | 29.75                      | 0.03      |
|                           |                     | P-D5-5-c  |                              |           | 0.48              | 0.005                          | 3         | 128                 | 5.1                     | 29.63                      | 0.02      |
|                           |                     | P-D5-2-a  |                              | 5         | 0.19              | 0.002                          | 4         | 55                  | 2.2                     | 29.58                      | 0.06      |
|                           |                     | P-D5-2-b  |                              |           | 0.19              | 0.002                          | 5         | 55                  | 2.2                     | 30.04                      | 0.07      |
|                           |                     | P-D5-2-c  |                              |           | 0.19              | 0.002                          | 6         | 55                  | 2.2                     | 29.54                      | 0.07      |
| P-D5-1-a                  | 5                   | 0.1       | 0.001                        | 7         | 28                | 1.1                            | 29.38     | 0.10                |                         |                            |           |
| P-D5-1-b                  |                     | 0.1       | 0.001                        | 8         | 28                | 1.1                            | 27.85     | 0.10                |                         |                            |           |
| P-D5-1-c                  |                     | 0.1       | 0.001                        | 9         | 28                | 1.1                            | 30.24     | 0.26                |                         |                            |           |
| MUSSEL TISSUE             | ERM-CE278k          | MT-D1-A1  | 0.159                        | 1         | 30                | 0.005                          | 1         | 87                  | 3.46                    | 15.35                      | 0.05      |
|                           |                     | MT-D1-A2  |                              |           | 30                | 0.005                          | 2         | 87                  | 3.46                    | 14.63                      | 0.02      |
|                           |                     | MT-D1-A3  |                              |           | 30                | 0.005                          | 3         | 87                  | 3.46                    | 14.64                      | 0.02      |
|                           |                     | MT-D2-A1  |                              | 2         | 30                | 0.005                          | 1         | 87                  | 3.46                    | 14.73                      | 0.03      |
|                           |                     | MT-D2-A2  |                              |           | 30                | 0.005                          | 2         | 87                  | 3.46                    | 14.84                      | 0.03      |
|                           |                     | MT-D2-A3  |                              |           | 30                | 0.005                          | 3         | 87                  | 3.46                    | 14.43                      | 0.03      |
|                           |                     | MT-D3-A1  |                              | 3         | 30                | 0.005                          | 1         | 87                  | 3.46                    | 14.21                      | 0.04      |
|                           |                     | MT-D3-A2  |                              |           | 30                | 0.005                          | 2         | 87                  | 3.46                    | n.m.                       | n.m.      |
|                           |                     | MT-D3-A3  |                              |           | 30                | 0.005                          | 3         | 87                  | 3.46                    | 14.84                      | 0.03      |
| BONE ASH                  | BCR-543             | B-A1      | 0.774                        | 1         | 30                | 0.023                          | 1         | 86                  | 3.45                    | -1.91                      | 0.02      |
|                           |                     | B-A2      |                              |           | 30                | 0.023                          | 2         | 86                  | 3.45                    | -1.65                      | 0.02      |
|                           |                     | B-A3      |                              |           | 30                | 0.023                          | 3         | 86                  | 3.45                    | -1.30                      | 0.02      |
|                           |                     | B-A4      |                              |           | 30                | 0.023                          | 4         | 86                  | 3.45                    | -1.88                      | 0.03      |
|                           |                     | B-A5      |                              |           | 30                | 0.023                          | 5         | 86                  | 3.45                    | -1.93                      | 0.02      |
|                           |                     | B-A6      |                              |           | 30                | 0.023                          | 6         | 86                  | 3.45                    | -1.67                      | 0.03      |
| LOBSTER<br>HEPATOPANCREAS | TORT-2              | T-A1      | 0.24                         | 1         | 30                | 0.007                          | 1         | 108                 | 4.33                    | 24.46                      | 0.04      |
|                           |                     | T-A2      |                              |           | 30                | 0.007                          | 2         | 108                 | 4.33                    | 23.77                      | 0.04      |
|                           |                     | T-A3      |                              |           | 30                | 0.007                          | 3         | 108                 | 4.33                    | 23.57                      | 0.04      |
|                           |                     | T-A4      |                              |           | 30                | 0.007                          | 4         | 108                 | 4.33                    | 24.58                      | 0.03      |
|                           |                     | T-A5      |                              |           | 30                | 0.007                          | 5         | 108                 | 4.33                    | 24.31                      | 0.03      |
|                           |                     | T-A6      |                              |           | 30                | 0.007                          | 1         | 108                 | 4.33                    | 22.84                      | 0.05      |
|                           |                     | T-A7      |                              |           | 30                | 0.007                          | 1         | 108                 | 4.33                    | 24.49                      | 0.06      |
|                           |                     | T-A8      |                              |           | 30                | 0.007                          | 1         | 108                 | 4.33                    | 24.07                      | 0.04      |
|                           |                     | T-A9      |                              |           | 30                | 0.007                          | 1         | 108                 | 4.33                    | 21.00                      | 0.03      |
|                           |                     | T-A10     |                              |           | 30                | 0.007                          | 1         | 108                 | 4.33                    | 22.00                      | 0.02      |
|                           |                     | T-A11     |                              |           | 30                | 0.007                          | 1         | 108                 | 4.33                    | 20.57                      | 0.02      |

|                                             |        |          |      |   |      |       |   |     |        |       |      |
|---------------------------------------------|--------|----------|------|---|------|-------|---|-----|--------|-------|------|
|                                             |        | T-A12    |      | 8 | 30   | 0.007 | 1 | 108 | 4.33   | 22.90 | 0.03 |
|                                             |        | T-A13    |      | 9 | 30   | 0.007 | 1 | 108 | 4.33   | 21.78 | 0.03 |
| FISH MUSSELE                                | DORM-2 | D-NS-A1  |      |   | 30   | 0.001 | 1 | 25  | 1      | 21.99 | 0.06 |
|                                             |        | D-NS-A2  | 1    |   | 30   | 0.001 | 2 | 25  | 1      | 21.66 | 0.06 |
|                                             |        | D-NS-A3  |      |   | 30   | 0.001 | 3 | 25  | 1      | 22.68 | 0.05 |
|                                             |        | D-D2     |      | 2 | 30   | 0.001 | 1 | 25  | 1      | 20.25 | 0.08 |
|                                             |        | D-D3     |      | 3 | 30   | 0.001 | 1 | 25  | 1      | 22.17 | 0.10 |
|                                             |        | D-D4     | 0.05 | 4 | 30   | 0.001 | 1 | 25  | 1      | 22.01 | 0.11 |
|                                             |        | D-D5     |      | 5 | 30   | 0.001 | 1 | 25  | 1      | 17.05 | 0.19 |
|                                             |        | D-D6     |      | 6 | 30   | 0.001 | 1 | 25  | 1      | 18.06 | 0.07 |
|                                             |        | D-D7     |      | 7 | 30   | 0.001 | 1 | 25  | 1      | 16.21 | 0.08 |
|                                             |        | D-D8     |      | 8 | 30   | 0.001 | 1 | 25  | 1      | 16.57 | 0.08 |
|                                             |        | D-D9     |      | 9 | 30   | 0.001 | 1 | 25  | 1      | 19.06 | 0.05 |
| FISH MUSSELE                                | DORM-4 | D4-a     |      |   | 8    | 0.010 | 1 | 150 | 6      | 29.74 | 0.02 |
|                                             |        | D4-b     |      |   | 8    | 0.010 | 2 | 150 | 6      | 29.57 | 0.02 |
|                                             |        | D4-c     | 1.2  | 1 | 8    | 0.010 | 3 | 150 | 6      | 29.80 | 0.03 |
|                                             |        | D4-a     |      |   | 8    | 0.010 | 1 | 25  | 1      | 31.03 | 0.09 |
|                                             |        | D4-b     |      |   | 8    | 0.010 | 2 | 25  | 1      | 31.24 | 0.06 |
|                                             |        | D4-c     |      |   | 8    | 0.010 | 3 | 25  | 1      | 31.56 | 0.08 |
| LOBSTER<br>HEPATOPANCREAS                   | TORT-3 | T3-a     |      |   | 13.3 | 0.004 | 1 | 90  | 3.6    | 24.34 | 0.05 |
|                                             |        | T3-b     | 0.33 | 1 | 13.3 | 0.004 | 2 | 90  | 3.6    | 24.16 | 0.03 |
|                                             |        | T3-c     |      |   | 13.3 | 0.004 | 3 | 90  | 3.6    | 24.02 | 0.04 |
| SEAWATER                                    | SW1G   | SW-6     |      |   |      | 0.005 | 6 | 100 | 4      | 31.71 |      |
|                                             |        | SW-7     |      |   |      | 0.005 | 7 | 100 | 4      | 31.22 |      |
|                                             |        | SW-8     | 0.17 |   |      | 0.005 | 8 | 100 | 4      | 30.78 |      |
|                                             |        | SW-9     |      |   |      | 0.005 | 9 | 100 | 4      | 31.57 |      |
| SOLUTION - with<br>chemical purification    | Li-7N  | Li-7N-a  |      |   |      | 0.001 | 1 | 25  | 1      | 30.78 | 0.13 |
|                                             |        | Li-7N-b  |      |   |      | 0.001 | 2 | 25  | 1      | 29.95 | 0.09 |
| SOLUTION - without<br>chemical purification | Li-7N  | Li-7N-1  |      |   |      |       |   | 125 | 5      | 30.15 | 0.03 |
|                                             |        | Li-7N-2  |      |   |      |       |   | 125 | 5      | 30.04 | 0.03 |
|                                             |        | Li-7N-3  |      |   |      |       |   | 125 | 5      | 30.04 | 0.03 |
|                                             |        | Li-7N-4  |      |   |      |       |   | 125 | 5      | 30.10 | 0.02 |
|                                             |        | Li-7N-5  |      |   |      |       |   | 125 | 5      | 29.96 | 0.03 |
|                                             |        | Li-7N-6  |      |   |      |       |   | 125 | 5      | 30.05 | 0.02 |
|                                             |        | Li-7N-7  |      |   |      |       |   | 100 | 4      | 30.24 | 0.03 |
|                                             |        | Li-7N-8  |      |   |      |       |   | 100 | 4      | 30.33 | 0.04 |
|                                             |        | Li-7N-9  |      |   |      |       |   | 100 | 4      | 30.18 | 0.03 |
|                                             |        | Li-7N-10 |      |   |      |       |   | 100 | 4      | 30.16 | 0.04 |
|                                             |        | Li-7N-11 |      |   |      |       |   | 100 | 4      | 30.11 | 0.03 |
|                                             |        | Li-7N-12 |      |   |      |       |   | 100 | 4      | 30.29 | 0.03 |
|                                             |        | Li-7N-13 |      |   |      |       |   | 100 | 4      | 30.21 | 0.03 |
|                                             |        | Li-7N-14 |      |   |      |       |   | 100 | 4      | 30.27 | 0.03 |
|                                             |        | Li-7N-15 |      |   |      |       |   | 100 | 4      | 30.10 | 0.02 |
|                                             |        | Li-7N-16 |      |   |      |       |   | 100 | 4      | 30.11 | 0.03 |
|                                             |        | Li-7N-17 |      |   |      |       |   | 63  | 2.5    | 30.15 | 0.04 |
|                                             |        | Li-7N-18 |      |   |      |       |   | 63  | 2.5    | 30.17 | 0.04 |
|                                             |        | Li-7N-19 |      |   |      |       |   | 63  | 2.5    | 30.10 | 0.04 |
|                                             |        | Li-7N-20 |      |   |      |       |   | 63  | 2.5    | 30.10 | 0.04 |
|                                             |        | Li-7N-21 |      |   |      |       |   | 31  | 1.25   | 30.20 | 0.10 |
|                                             |        | Li-7N-22 |      |   |      |       |   | 31  | 1.25   | 30.39 | 0.09 |
|                                             |        | Li-7N-23 |      |   |      |       |   | 31  | 1.25   | 30.23 | 0.05 |
|                                             |        | Li-7N-24 |      |   |      |       |   | 31  | 1.25   | 30.35 | 0.12 |
|                                             |        | Li-7N-25 |      |   |      |       |   | 16  | 0.625  | 29.83 | 0.19 |
|                                             |        | Li-7N-26 |      |   |      |       |   | 16  | 0.625  | 30.50 | 0.13 |
|                                             |        | Li-7N-27 |      |   |      |       |   | 16  | 0.625  | 30.37 | 0.16 |
|                                             |        | Li-7N-28 |      |   |      |       |   | 16  | 0.625  | 30.55 | 0.14 |
|                                             |        | Li-7N-29 |      |   |      |       |   | 3   | 0.125  | 28.35 | 0.59 |
|                                             |        | Li-7N-30 |      |   |      |       |   | 3   | 0.125  | 28.82 | 2.46 |
|                                             |        | Li-7N-31 |      |   |      |       |   | 3   | 0.125  | 30.20 | 0.70 |
|                                             |        | Li-7N-32 |      |   |      |       |   | 3   | 0.125  | 31.41 | 0.66 |
|                                             |        | Li-7N-33 |      |   |      |       |   | 2   | 0.0625 | 27.51 | 1.25 |
|                                             |        | Li-7N-34 |      |   |      |       |   | 2   | 0.0625 | 28.70 | 1.06 |
|                                             |        | Li-7N-35 |      |   |      |       |   | 2   | 0.0625 | 28.97 | 1.04 |
|                                             |        | Li-7N-36 |      |   |      |       |   | 2   | 0.0625 | 29.91 | 0.78 |

**Table S2:** Li isotope data for LSVEC-DORM-2 mixtures corresponding to the standard addition method described in the main text. "DW<sub>DORM</sub>": DORM-2 equivalent of dry weight loaded on column, "Li<sub>LSVEC</sub>": Li mass from LSVEC added to DORM-2 before Li separation through columns, "Li<sub>mix</sub>": Li concentration of the mixture, "bracket match" for the concentration matching with the standard bracketing during isotope ratio measurement, "se" for internal error, "2SD" for the standard deviation of the "n" Li-purification replicates. Sample name code: "D" for DORM-2, "NS" for not "spiked", A# for Li-purification aliquot number (correspond to "n").

| Sample Type | Sample Name | DW <sub>DORM</sub> (mg) | Li <sub>LSVEC</sub> (ng) | Li <sub>mix</sub> (μg/g) | Bracket match (%) | δ <sup>7</sup> Li (‰) | se (‰) | δ <sup>7</sup> Li (‰) | 2 SD (‰) | n |
|-------------|-------------|-------------------------|--------------------------|--------------------------|-------------------|-----------------------|--------|-----------------------|----------|---|
| FISH MUSSLE | D-NS-A1     | 31.3                    | 0                        | 0.05                     | 25                | 21.99                 | 0.06   |                       |          |   |
| FISH MUSSLE | D-NS-A2     | 31.3                    | 0                        | 0.05                     | 25                | 21.66                 | 0.06   | 22.11                 | 1.05     | 3 |
| FISH MUSSLE | D-NS-A3     | 31.3                    | 0                        | 0.05                     | 25                | 22.68                 | 0.05   |                       |          |   |
| FISH MUSSLE | D-S0.1-A1   | 31.3                    | 1.5                      | 0.1                      | 50                | 9.71                  | 0.03   |                       |          |   |
| FISH MUSSLE | D-S0.1-A2   | 31.3                    | 1.5                      | 0.1                      | 50                | 9.11                  | 0.04   | 9.53                  | 0.72     | 3 |
| FISH MUSSLE | D-S0.1-A3   | 31.3                    | 1.5                      | 0.1                      | 50                | 9.76                  | 0.04   |                       |          |   |
| FISH MUSSLE | D-S0.5-A1   | 31.3                    | 13.5                     | 0.5                      | 95                | 2.77                  | 0.04   |                       |          |   |
| FISH MUSSLE | D-S0.5-A2   | 31.3                    | 13.5                     | 0.5                      | 95                | 2.23                  | 0.06   | 2.38                  | 0.69     | 6 |
| FISH MUSSLE | D-S0.5-A3   | 31.3                    | 13.5                     | 0.5                      | 95                | 2.13                  | 0.06   |                       |          |   |
| FISH MUSSLE | D-S1-A1     | 31.3                    | 28.5                     | 1                        | 106               | 1.46                  | 0.03   |                       |          |   |
| FISH MUSSLE | D-S1-A2     | 31.3                    | 28.5                     | 1                        | 106               | 1.26                  | 0.06   | 1.32                  | 0.26     | 3 |
| FISH MUSSLE | D-S1-A3     | 31.3                    | 28.5                     | 1                        | 106               | 1.22                  | 0.03   |                       |          |   |
| FISH MUSSLE | D-S5-A1     | 31.3                    | 148.5                    | 5                        | 105               | 0.52                  | 0.03   |                       |          |   |
| FISH MUSSLE | D-S5-A2     | 31.3                    | 148.5                    | 5                        | 105               | 0.77                  | 0.02   | 0.61                  | 0.29     | 3 |
| FISH MUSSLE | D-S5-A3     | 31.3                    | 148.5                    | 5                        | 105               | 0.53                  | 0.02   |                       |          |   |
